1 **Title:**

2 Multi-channel intraneural vagus nerve recordings with a novel high-density carbon fiber  
3 microelectrode array

4

5 **Authors:**

6 Ahmad A. Jiman<sup>1,2,3</sup>, David C. Ratze<sup>2,4</sup>, Elissa J. Welle<sup>1,2</sup>, Paras R. Patel<sup>1,2</sup>, Julianna M. Richie<sup>1,2</sup>,  
7 Elizabeth C. Bottorff<sup>1,2</sup>, John P. Seymour<sup>1,4,5</sup>, Cynthia A. Chestek<sup>1,2,4</sup>, Tim M. Bruns<sup>1,2,\*</sup>

8

9 1- Department of Biomedical Engineering, University of Michigan, Ann Arbor, MI, USA

10 2- Biointerfaces Institute, University of Michigan, Ann Arbor, MI, USA

11 3- Department of Electrical and Computer Engineering, King Abdulaziz University, Jeddah,

12 Saudi Arabia

13 4- Department of Electrical Engineering and Computer Science, University of Michigan, Ann

14 Arbor, MI, USA

15 5- Department of Neurosurgery, University of Texas Health Science Center, Houston, TX, USA

16

17 Corresponding Author:

18 \*Tim M. Bruns, Ph.D.

19 NCRC - B10 - A-169

20 2800 Plymouth Road

21 Ann Arbor, MI 48109, USA

22 Phone: (734) 647-8727

23 Email: [bruns@umich.edu](mailto:bruns@umich.edu)

24

25 **Abstract**

26 Autonomic nerves convey essential neural signals that regulate vital body functions. Recording  
27 clearly distinctive physiological neural signals from autonomic nerves will help develop new  
28 treatments for restoring regulatory functions. However, this is very challenging due to the small  
29 nature of autonomic nerves and the low-amplitude signals from their small axons. We developed  
30 a multi-channel, high-density, intraneural carbon fiber microelectrode array (CFMA) with ultra-  
31 small electrodes (8-9  $\mu\text{m}$  in diameter, 150-250  $\mu\text{m}$  in length) for recording physiological action  
32 potentials from small autonomic nerves. In this study, we inserted CFMA with up to 16  
33 recording carbon fibers in the cervical vagus nerve of 22 isoflurane-anesthetized rats. We  
34 recorded action potentials with peak-to-peak amplitudes of 15.1-91.7  $\mu\text{V}$  and signal-to-noise  
35 ratios of 2.0-8.3 on multiple carbon fibers per experiment, determined conduction velocities of  
36 some vagal signals in the afferent (0.7-1.0 m/sec) and efferent (0.7-8.8 m/sec) directions, and  
37 monitored firing rate changes in breathing and blood glucose modulated conditions. Overall,  
38 these experiments demonstrated that CFMAs are a novel interface for in-vivo intraneural action  
39 potential recordings from autonomic nerves. This work is a milestone towards the  
40 comprehensive understanding of physiological neural signaling and the development of  
41 innovative treatment modalities for restoring vital functions controlled by autonomic nerves.

42

## 43 **Introduction**

44 The autonomic nervous system has a major role in the regulation of unconscious functions that  
45 are essential to the body. The system is divided into the sympathetic nervous system, which  
46 controls “fight-or-flight” responses, and the parasympathetic nervous system, which regulates  
47 “rest-and-digest” functions<sup>1</sup>. A main parasympathetic nerve is the vagus nerve, which innervates  
48 many visceral organs, such as the heart, lungs, stomach, liver, pancreas and intestines<sup>2,3</sup>, and  
49 contributes to the regulation of numerous autonomic functions, which include breathing, immune  
50 responses, digestion, glucose metabolism and others<sup>4-8</sup>. The vagus nerve at the cervical level is  
51 partially composed of myelinated A $\delta$  and B fibers<sup>9,10</sup>, but the great majority of axons (over 80%)  
52 are unmyelinated C-fibers<sup>2,11,12</sup>. These fibers predominantly convey afferent (sensory) signals  
53 from the innervated organs to the central nervous system<sup>13</sup>. Hence, the vagus nerve is an  
54 attractive target for monitoring the physiological state of visceral organs for therapeutic or  
55 scientific objectives.

56 A class of therapies that has gained considerable interest in recent years is bioelectronic  
57 medicine, which targets autonomic nerves to detect and alter neural activity for restoring  
58 autonomic functions<sup>14-16</sup>. The variety of bioelectronic medicine applications that target the vagus  
59 nerve have led to clinical trials on vagus nerve stimulation (VNS) for patients with epilepsy<sup>17</sup>,  
60 stroke<sup>18</sup>, depression<sup>19</sup>, rheumatoid arthritis<sup>20</sup>, obesity<sup>21</sup>, and type-2 diabetes<sup>22</sup>, among others.  
61 Despite the therapeutic benefits of VNS and bioelectronic medicine, stimulation patterns are  
62 generally selected by experimenting with different parameters without monitoring the  
63 physiological signaling in the nerve. A key element that is needed to achieve the full potential of  
64 bioelectronic medicine is a better understanding of neural signaling in normal and modulated  
65 physiological conditions.

66 Recording neural activity from autonomic nerves is very challenging due to the often sub-  
67 millimeter nature of these nerves<sup>23,24</sup>, the protective layers surrounding the nerve (epineurium),  
68 bundle of axons (perineurium) and individual axons (endoneurium)<sup>25,26</sup>, and the low-amplitude  
69 waveforms generated from small unmyelinated C-fibers<sup>27</sup> that dominate autonomic nerves<sup>28,29</sup>.  
70 Studies have applied electrical stimulation on autonomic nerves to record evoked neural activity  
71 using extraneural electrodes, which record from outside the nerve<sup>9,30</sup>, and intraneural electrodes,  
72 which penetrate the nerve<sup>31</sup>. Although electrical stimulation-evoked responses can be useful in  
73 determining the type of activated fibers, these responses do not represent physiological neural  
74 signaling. A few research groups have obtained physiological neural recordings from autonomic  
75 nerves using extraneural cuff electrodes<sup>32-36</sup>. However, extraneural electrodes lack spatial  
76 selectivity, as these electrodes record the compound activity of hundreds to thousands of axons  
77 from outside the nerve. Intraneural electrodes penetrate the nerve to be closer to axons and  
78 provide better selectivity and higher signal-to-noise ratio (SNR) recordings than extraneural  
79 electrodes<sup>25,26</sup>. Intraneural high-density Utah slanted electrode arrays (HD-USEAs) have 48  
80 electrodes (30-100  $\mu\text{m}$  tapered diameter) in a 5x10 configuration (pitch of 200  $\mu\text{m}$ ; corner  
81 electrodes used as reference and ground) and have been used to record signals in cat pudendal  
82 nerves, which have an approximate diameter of 1 mm<sup>37,38</sup>. This configuration of the silicon-  
83 based HD-USEA is large (1x2 mm) and rigid for most autonomic nerves, which are often under  
84 1 mm in diameter. For recording from small-diameter ( $\leq 0.5$  mm) autonomic nerves, carbon  
85 nanotube (CNT) electrodes have demonstrated high SNR recordings ( $> 10$  dB) in rat  
86 glossopharyngeal and vagus nerves (diameter of 100-300  $\mu\text{m}$ )<sup>23</sup>. This was achieved by inserting  
87 two CNT electrodes (10  $\mu\text{m}$  in diameter) in a nerve target at a 2-mm separation to obtain a single  
88 differential recording. Another research group inserted 4-channel carbon fiber arrays (electrode

89 diameter  $\leq 15 \mu\text{m}$ , pitch of  $150 \mu\text{m}$ ) in tracheosyringeal nerves of zebra finch birds, which are  
90  $125 \mu\text{m}$  in diameter and mostly composed of myelinated fibers (99%)<sup>31</sup>. They obtained  
91 spontaneous recordings but primarily demonstrated electrical stimulation-evoked compound  
92 neural responses. Autonomic nerves are typically dominated by hundreds to thousands of  
93 unmyelinated fibers<sup>28,29,39,40</sup>. The fibers of the vagus nerve in particular innervate multiple  
94 critical organs and contribute to the regulation of many autonomic functions<sup>2-8</sup>. Therefore, a  
95 need remains for an intraneural electrode array that can record physiological single-neuron  
96 activity at multiple sampling locations within small autonomic nerves.

97 Our research group has developed a novel, multi-channel, blowtorch-sharpened, intraneural  
98 carbon fiber microelectrode array (CFMA) for small autonomic nerves. The CFMA has ultra-  
99 small recording electrodes ( $8\text{-}9 \mu\text{m}$  in diameter,  $150\text{-}250 \mu\text{m}$  in length) in a higher-density  
100 configuration than previously reported arrays (16 carbon fibers in 2 rows, with a  $132 \mu\text{m}$  pitch  
101 along the array and  $50 \mu\text{m}$  between rows). Prior versions of the CFMA with longer ( $500\text{-}5000$   
102  $\mu\text{m}$ ), unsharpened carbon fibers have demonstrated high SNR recordings with minimal tissue  
103 damage in the rat cerebral cortex<sup>41-44</sup>. We hypothesized that this novel CFMA would obtain  
104 physiological action potential recordings with high SNR in small autonomic nerves. In this  
105 study, we inserted CFMAs in rat cervical vagus nerves (diameter of  $300\text{-}500 \mu\text{m}$ ). We recorded  
106 action potentials on multiple carbon fibers per experiment, determined the propagation direction  
107 and conduction velocity of some vagal signals, and monitored changes in neural activity in  
108 breathing and blood glucose modulated conditions.

109

## 110 **Results**

111 We fabricated CFMAs with 16 carbon fibers in a 2x8 configuration. Fibers within each row had  
 112 a pitch of 132  $\mu\text{m}$ , and the two rows were separated by 50  $\mu\text{m}$  (Figure 1a). The carbon fibers,  
 113 which had a diameter of 8-9  $\mu\text{m}$ , were cut to 150-250  $\mu\text{m}$  in length and the tips were sharpened  
 114 with a blowtorch (Figure 1b). The active recording site for a carbon fiber is coated with poly(3,4-  
 115 ethylene-dioxythiophene):sodium p-toluenesulfonate (PEDOT:pTS) and spans 135-160  $\mu\text{m}$  in  
 116 length from the tip. To facilitate CFMA insertion in a rat vagus nerve, we designed a nerve-  
 117 holder to secure and elevate the vagus nerve away from fluid and breathing motions of the  
 118 cervical cavity, and allow accurate positioning of a small camera to visualize the CFMA-nerve  
 119 interface during insertion (Figure 1c).

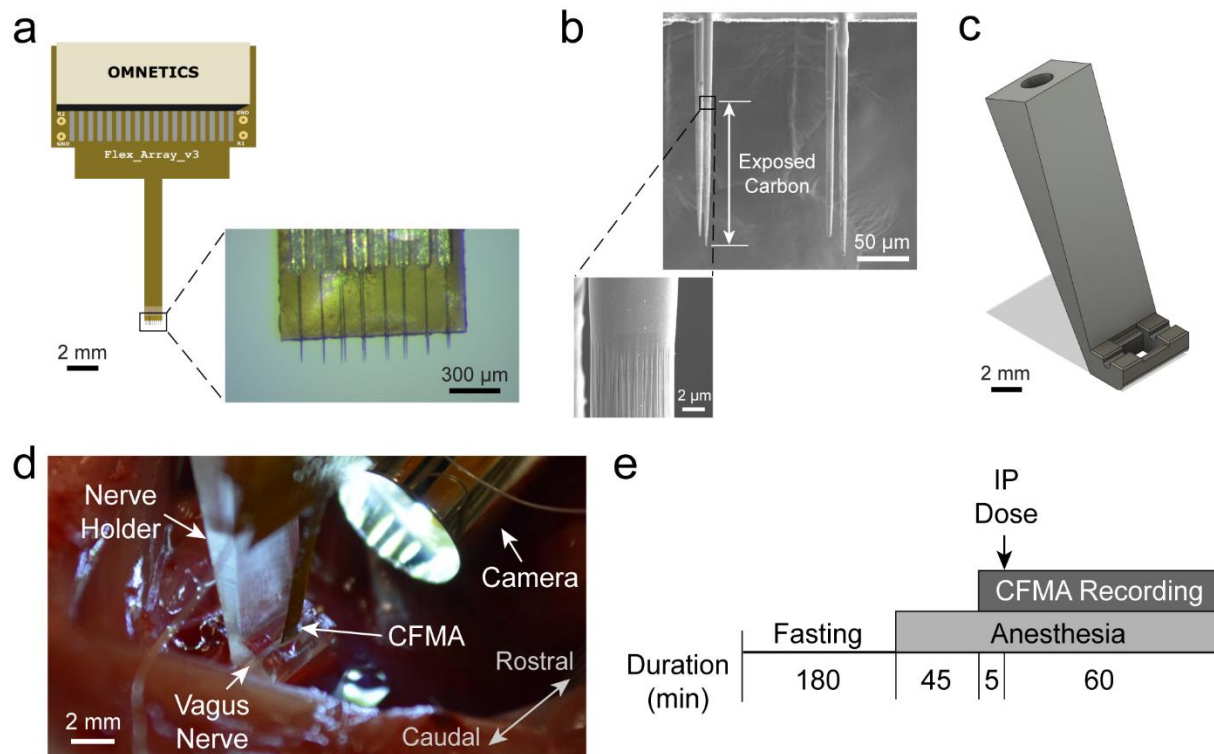

120

121 **Figure 1. Carbon Fiber Microelectrode Array (CFMA) and experimental setup.** (a) CFMA with 16 blowtorch-  
 122 sharpened carbon fibers in a 2x8 configuration. (b) Scanning Electron Microscopy (SEM) images of sharpened  
 123 carbon fibers. Arrows indicate an exposed (non-insulated) carbon fiber region with a length of ~140  $\mu\text{m}$   
 124 from the tip. (c) Design of a nerve-holder to facilitate CFMA insertion in a rat vagus nerve. Dimensions of the design are  
 125 shown in Supplementary Fig. S1. (d) Surgical setup for inserting CFMA in the vagus nerve. (e) Timeline for the

126 experimental protocol. An intraperitoneal (IP) dose of glucose, insulin, 2-deoxy-D-glucose, or saline was injected to  
127 modulate blood glucose concentration levels.

128

129 We inserted 6 CFMAs in the left cervical vagus nerve of 22 Sprague-Dawley rats. We observed  
130 neural activity on 167 out of 326 inserted functional carbon fibers (impedance  $< 1 \text{ M}\Omega$ ). The  
131 neural activity on each carbon fiber was sorted into 1 neural cluster ( $n=160$ ) or 2 neural clusters  
132 ( $n=7$ ). The functional carbon fibers had an average impedance of  $31.3 \pm 42.0 \text{ k}\Omega$  (mean  $\pm$   
133 standard deviation) in saline before an experiment,  $70.8 \pm 81.9 \text{ k}\Omega$  in the nerve immediately after  
134 insertion, and  $94.7 \pm 146.7 \text{ k}\Omega$  in the nerve at the end of the experiment. Three of the CFMAs  
135 were used in more than one experiment (4-8 experiments per CFMA), which initially had a total  
136 of 48 functional carbon fibers (16 carbon fibers per CFMA) with an average impedance of  $52.8 \pm$   
137  $36.8 \text{ k}\Omega$  after insertion in the first experiment. After insertion in the fourth experiment, 45 carbon  
138 fibers on these three CFMAs (14-16 carbon fibers per CFMA) remained functional with an  
139 average impedance of  $92.6 \pm 149.5 \text{ k}\Omega$ . On average for a single experiment, we made  $2.3 \pm 2.9$   
140 attempts to insert a CFMA with  $14.8 \pm 1.8$  functional carbon fibers and observed neural activity  
141 on  $7.6 \pm 5.8$  carbon fibers. There were no distinctive differences among the recordings of rats  
142 with different gender or sizes.

### 143 ***Multi-Channel Recordings of Vagal Nerve Activity***

144 We observed physiological neural activity in the vagus nerve on at least one recording carbon  
145 fiber in 19 of the total 22 experiments. The recorded neural activity was sorted into clusters and  
146 the mean peak-to-peak amplitudes of the sorted clusters were between  $15.1$  and  $91.7 \mu\text{V}$  with  
147 SNR of 2.0-8.3. An example of vagal nerve activity on multiple recording carbon fibers from the  
148 same experiment is shown in Figure 2a.

149 Propagation of vagal signals were detected along adjacent recording carbon fibers in some  
 150 experiments. We observed neural signals in 10 experiments propagating in the afferent direction  
 151 with conduction velocities of 0.7-1.0 m/sec over the span of 2-7 carbon fibers (132-792  $\mu\text{m}$ ).  
 152 Furthermore, we monitored efferent signals conducting at 0.7-8.8 m/sec along 2-5 carbon fibers  
 153 (132-528  $\mu\text{m}$ ) in 5 experiments. Examples of propagating afferent signals are shown in Figure 2b  
 154 with cross-correlation to inspect the latency of those signals along CFMA carbon fibers (Figure  
 155 2c).

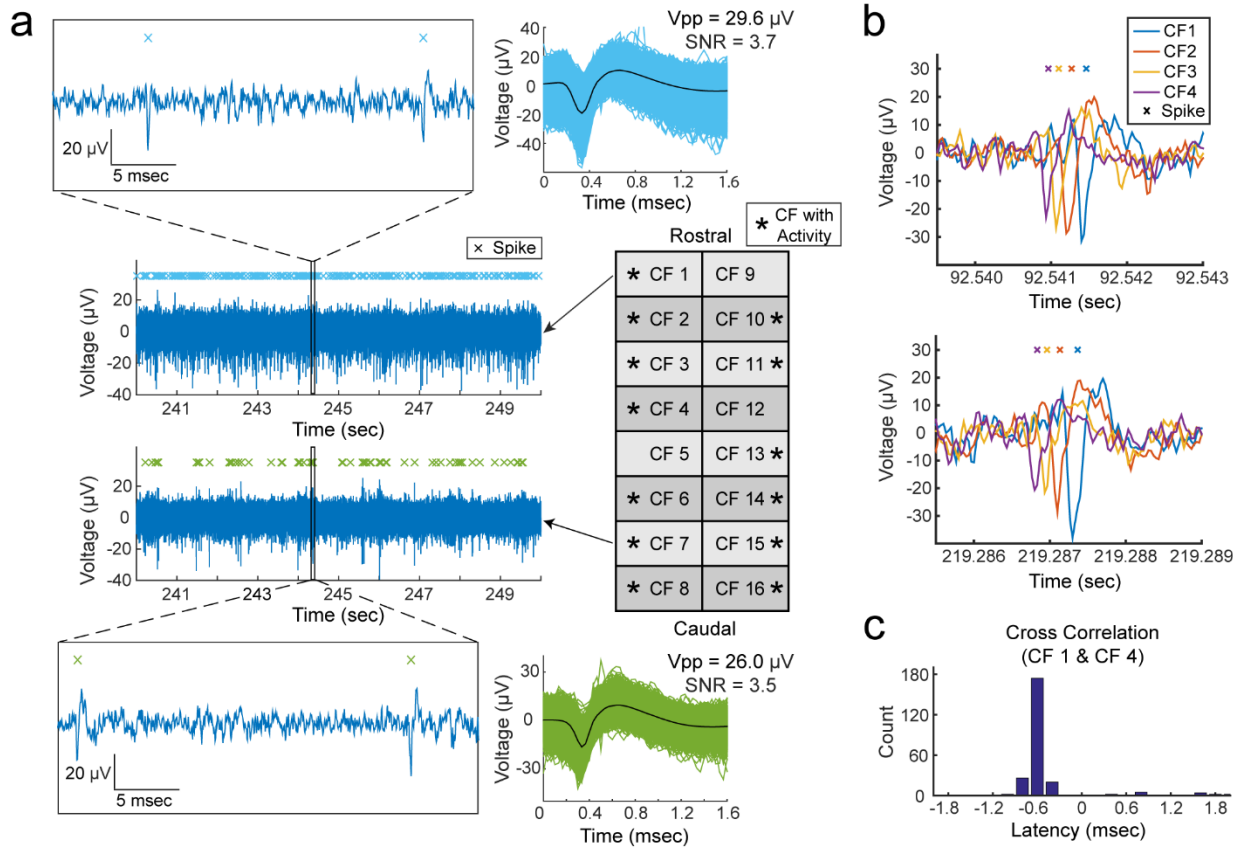

156

157 **Figure 2. Representative recordings of physiological vagal nerve activity and signal propagation along CFMA**  
 158 **carbon fibers (CFs).** (a) Recordings of vagal nerve activity on 2 carbon fibers (CF 1 and CF 7) in the same  
 159 experiment showing distinctive signals. The firing of sorted spikes (marked with x) are unique across CFs. (b)  
 160 Instances of signal propagation along CF 1 – CF 4. (c) Cross correlation of spikes on CF 1 and CF 4. The prevalent  
 161 latency occurred at -0.6 msec with a count of 174 spikes (55.8% of spikes on CF 4). At latency of -0.6 msec, the  
 162 spikes occurred on CF 4 before CF 1, suggesting that the signal is propagating in the afferent direction at a  
 163 conduction velocity of 0.7 m/sec.

164



165 ***Breathing-Related Neural Activity***

166 We observed vagal signals with periodic bursting firing behavior (n=6 experiments) at repetition  
167 rates of  $39.4 \pm 10.8$  cycles/min, which were similar to the animals' breathing rates of  $39.3 \pm 9.9$   
168 breaths/min (Figure 3). In a subset of experiments (n=3), we reduced the breathing rate to  $20.0 \pm$   
169  $8.0$  breaths/min by increasing the depth of anesthesia, and the firing-burst repetition rates  
170 reduced to a similar level at  $19.1 \pm 10.3$  cycles/min, with maintained peak-to-peak amplitudes  
171 ( $31.7 \pm 11.6 \mu\text{V}$  to  $29.3 \pm 10.1 \mu\text{V}$ ) and inter-spike interval (ISI) peak values ( $9.2 \pm 1.6$  msec to  
172  $10.5 \pm 1.6$  msec), as shown in the example in Figure 3a. The periodic bursting behaviors were  
173 usually firing at one ISI peak of  $9.5 \pm 1.3$  msec. However, in two experiments, two distinct ISI  
174 peaks were observed at  $9.8 \pm 1.8$  msec and  $24.2 \pm 6.0$  msec (e.g. Figure 3b).

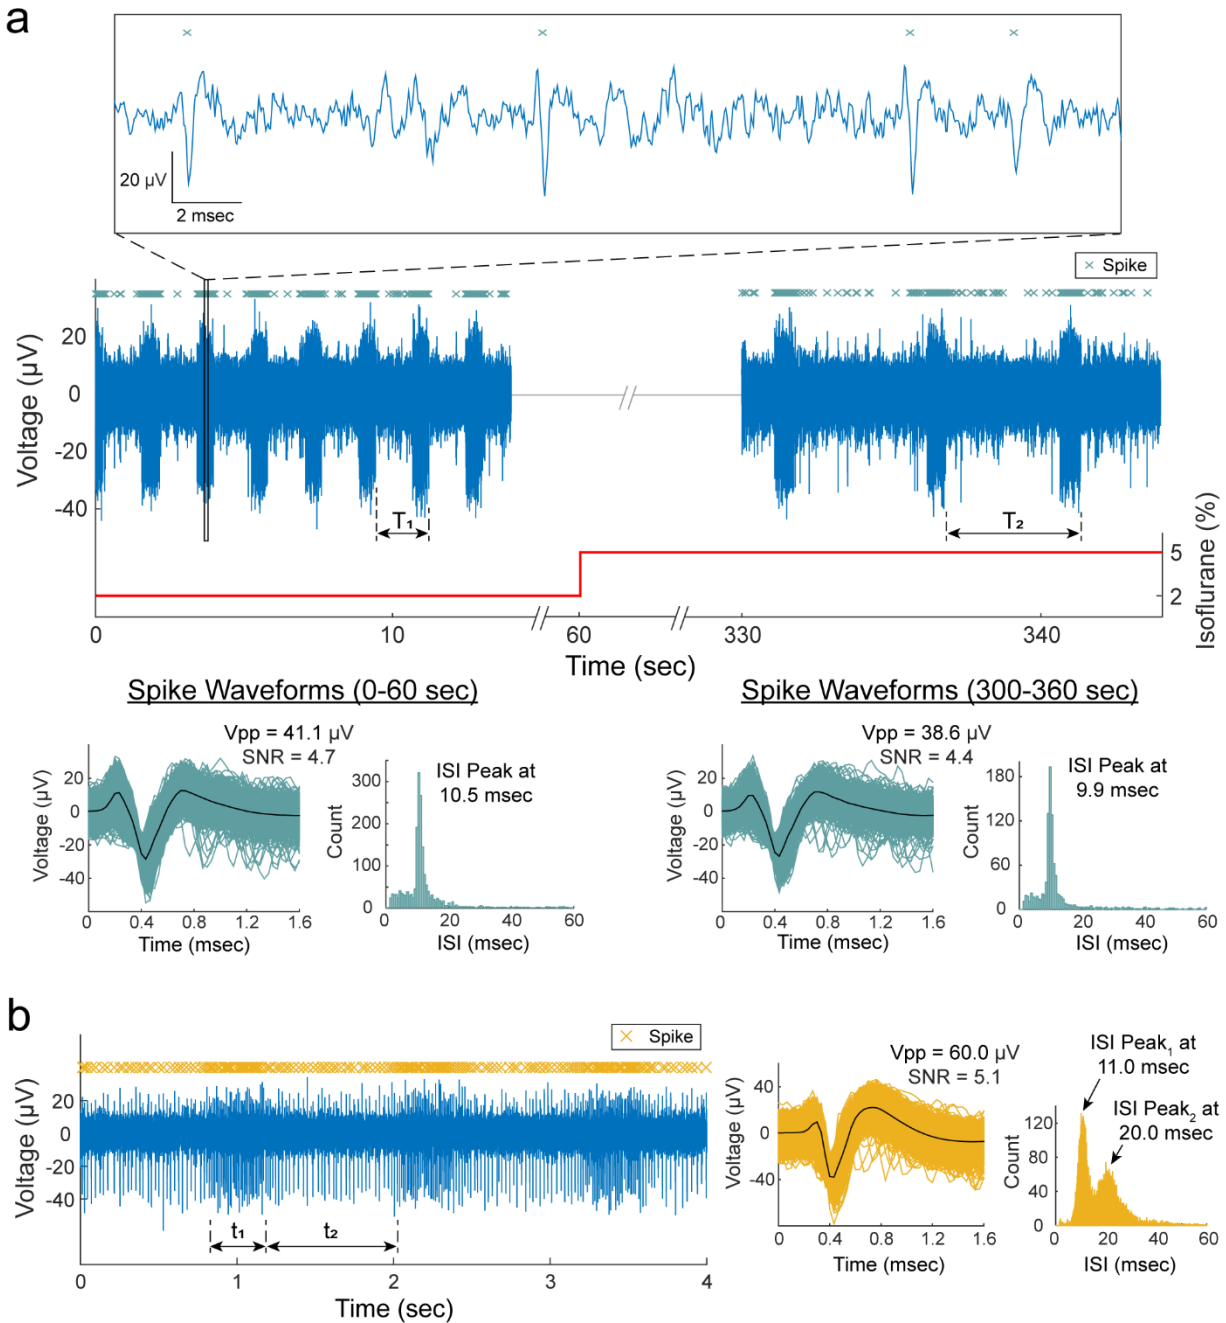

175

176 **Figure 3. Breathing-related neural activity.** (a) Recordings of vagus nerve activity at 2% and 5% isoflurane. The  
 177 bursting firing behavior had a repetition rate of 32.2 cycles/min ( $1/T_1$ ) during animal's breathing rate of 32  
 178 breaths/min at 2% isoflurane. The firing-behavior repetition rate reduced to 14.2 cycles/min ( $1/T_2$ ) as the breathing  
 179 rate reduced to ~12 breaths/min at 5% isoflurane. The average peak-to-peak amplitude ( $V_{pp}$ ) and inter-spike  
 180 interval (ISI) peaks were similar for the spike waveforms at 2% and 5% isoflurane. (b) Bursting firing behavior at  
 181 two distinct ISIs indicated at the  $t_1$  and  $t_2$  durations. The animal's breathing rate was ~44 breaths/min and the  
 182 repetition rate for the bursting firing behavior was 47.3 cycles/min ( $1/[t_1+t_2]$ ).

183

184 *Neural Firing Rate Behavior in Blood Glucose Modulation Conditions*

185 In each experiment, we recorded vagal nerve activity for a baseline period of at least 5 minutes  
186 before the intraperitoneal (IP) injection of a blood glucose modulation dose (glucose, insulin, 2-  
187 deoxy-D-glucose, or saline). Recordings were continued for 60 minutes after the injection.  
188 Physiological parameters (blood glucose concentration, breathing rate, and heart rate) were  
189 measured every 5 minutes throughout the entire experiment. The recorded neural activity were  
190 sorted into 174 clusters. The firing rate of these clusters showed moderate or high correlation  
191 coefficients ( $|\rho| \geq 0.3$ ) with one (n=15), two (n=35), or all three (n=96) of the tracked  
192 physiological parameters. However, correlation coefficients did not show clear associations  
193 between any glucose modulation dosing and any of the physiological parameters across  
194 experiments. An experiment with a carbon fiber that recorded the activity of 2 sorted clusters,  
195 along with the physiological measurements (blood glucose concentration, breathing rate and  
196 heart rate) and correlation coefficients, is shown in Figure 4.

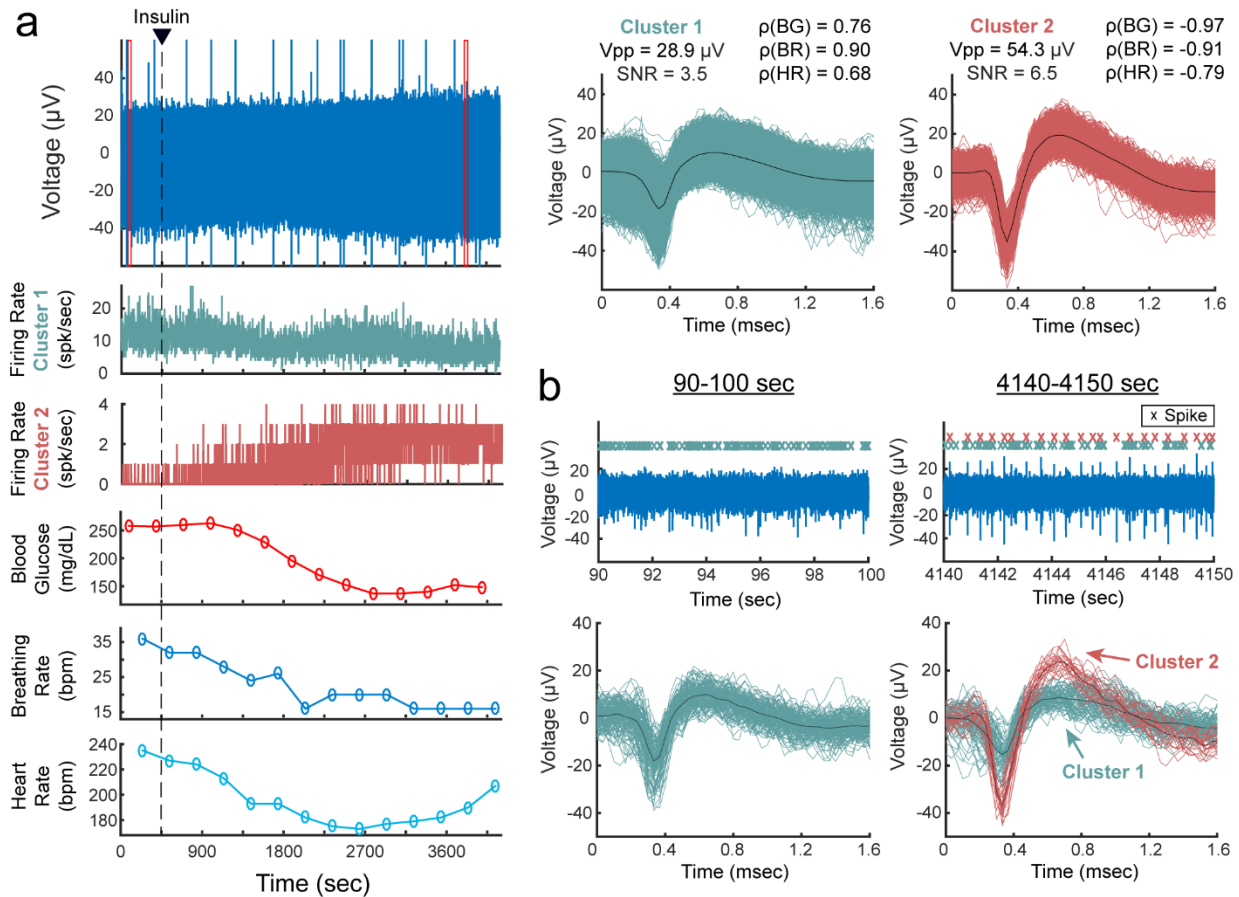

197

198 **Figure 4. Vagus nerve recordings with sorted clusters in an insulin-injected experiment.** (a) Filtered signal of a  
 199 vagus nerve recording, firing rates of the two sorted clusters, and measurements of blood glucose (BG)  
 200 concentration, breathing rate (BR) and heart rate (HR). The waveforms of the sorted clusters are shown with the  
 201 average peak-to-peak amplitude ( $V_{pp}$ ), signal-to-noise ratio (SNR), and correlation coefficients ( $\rho$ ) between cluster  
 202 firing rate and BG, BR and HR measurements. The red boxes in the voltage plot indicate the time-window for the  
 203 plots in b. (b) Filtered signal of the vagus nerve recording before and after insulin injection, and the spike  
 204 waveforms of the two sorted clusters within each 10-sec window.

205

206 Although correlation coefficients did not show a clear relationship between any of the glucose  
 207 modulation doses and physiological parameters, we observed clusters with interesting firing rate  
 208 behaviors after injection of a modulation dose, as shown in Figure 5. In some glucose injection  
 209 experiments ( $n=4$ ), we observed neural clusters ( $n=11$ ) with an average peak-to-peak amplitude  
 210 of  $24.7 \pm 6.4 \mu\text{V}$  with an initial firing rate of  $6.8 \pm 8.9$  spikes/sec that decreased after

211 administration of glucose to  $1.8 \pm 2.4$  spikes/sec (e.g. Figure 5a). The clusters in one of these  
212 experiments showed signal propagation in the afferent direction at a conduction velocity of 0.7  
213 m/sec. In some experiments with an insulin injection (n=4), neural clusters (n=4) with  
214 amplitudes of  $53.3 \pm 28.0$   $\mu$ V peak-to-peak increased their firing rates from  $1.2 \pm 1.8$  spikes/sec  
215 to  $7.6 \pm 10.4$  spikes/sec at 1-13 minutes after insulin administration (e.g. Figure 5b). Injection of  
216 2-deoxy-D-glucose (2-DG) induced a similar neural response to insulin in some experiments  
217 (n=2). Starting at 1-9 minutes after 2-DG administration, clusters (n=6) with an average  
218 amplitude of  $29.2 \pm 8.1$   $\mu$ V peak-to-peak increased their firing rates from  $3.8 \pm 4.6$  spikes/sec to  
219  $9.8 \pm 10.1$  spikes/sec (e.g. Figure 5c). Two of these clusters that responded to 2-DG were  
220 propagating in the afferent direction at a conduction velocity of 0.7 m/sec. A summary of all the  
221 performed experiments is shown in Supplementary Table S1.

222

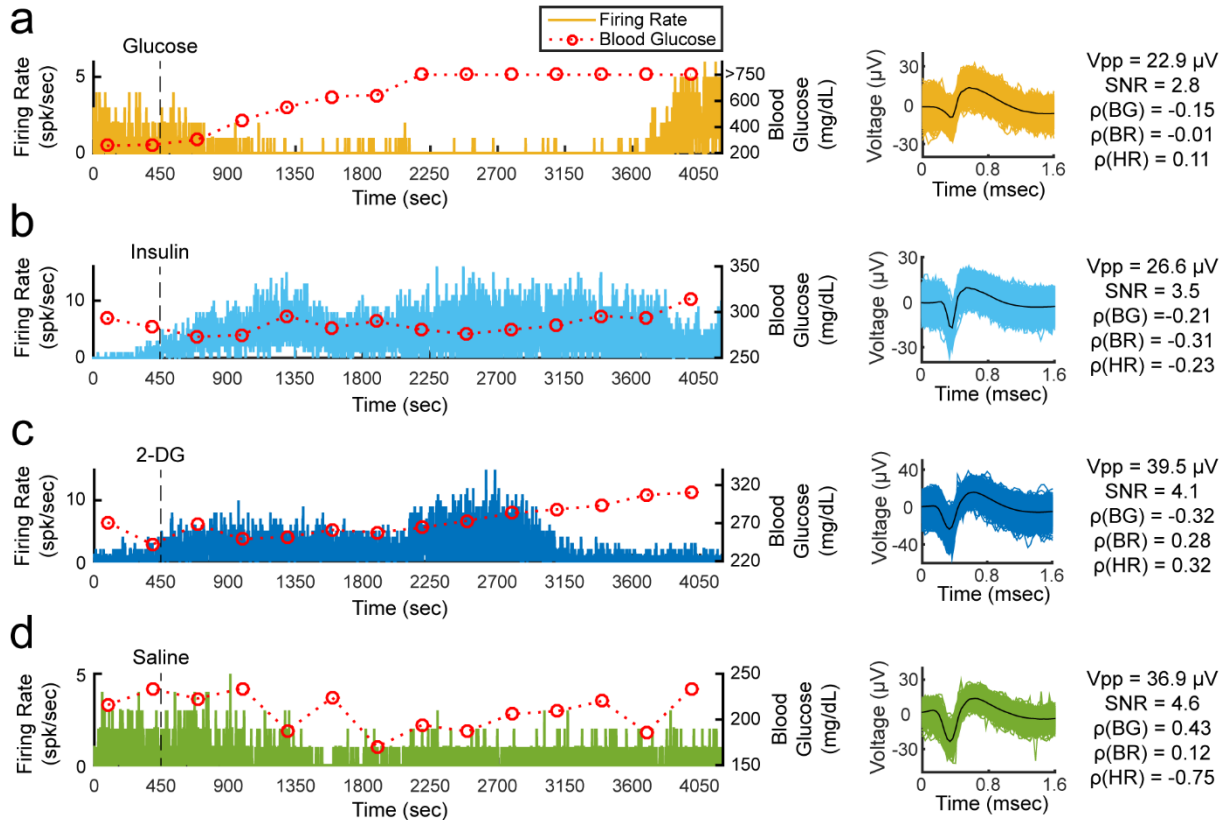

223

224 **Figure 5. Examples of sorted clusters and their firing rates in blood glucose modulated conditions.** The  
 225 clusters were observed in blood glucose modulation experiments with an intraperitoneal (IP) injection of **(a)**  
 226 glucose, **(b)** insulin, **(c)** 2-deoxy-D-glucose (2-DG), or **(d)** saline. The waveforms of the sorted clusters are shown  
 227 with the average peak-to-peak amplitude ( $V_{pp}$ ), signal-to-noise ratio (SNR), correlation coefficients ( $\rho$ ) between  
 228 cluster firing rate and blood glucose (BG) concentration, breathing rate (BR) and heart rate (HR). Blood glucose  
 229 concentration measurements above 750 mg/dL were not available due to the limitations of the glucometer.

230

## 231 Discussion

232 We developed a multi-channel, high-density, intraneural carbon fiber microelectrode array  
 233 (CFMA) for recording neural signals in autonomic nerves (Figure 1). Using the CFMA, we  
 234 obtained axonal action potential recordings in rat cervical vagus nerves with signal-to-noise ratio  
 235 (SNR) of 2.0-8.3. We recorded physiological vagal nerve activity that was unique across  
 236 multiple channels per experiment (Figure 2a), determined the propagation direction and  
 237 conduction velocity of some vagal signals (Figure 2b), and monitored changes in neural activity

238 in physiologically modulated conditions (Figures 3-5). These data demonstrate CFMA as a new  
239 interface for in-vivo intraneural recordings. This work, to our knowledge, is the first to  
240 demonstrate in-vivo physiological action potential recordings on multiple channels in a sub-  
241 millimeter autonomic nerve. Monitoring physiological signaling in autonomic nerves will help  
242 researchers better understand the neural control and feedback processes for autonomic organs,  
243 which is a key element for developing innovative treatment modalities to restore vital body  
244 functions regulated by autonomic nerves.

245 Our experimental recordings demonstrated CFMA as a multi-channel, intraneural array for  
246 small-diameter ( $\leq 0.5$  mm) autonomic nerves. In prior work, the high-density Utah slanted  
247 electrode array (HD-USEA) was implanted in a 1-mm diameter cat pudendal nerve<sup>37</sup>. While the  
248 48-channel, 200  $\mu\text{m}$  pitch HD-USEA (footprint over 1  $\text{mm}^2$ ) was used to record physiological  
249 signaling from autonomic organs (feline lower urinary tract)<sup>37</sup>, the size of the HD-USEA  
250 electrode shanks (300-800  $\mu\text{m}$  in length, 30-100  $\mu\text{m}$  in diameter)<sup>38</sup> are much larger than in the  
251 CFMA and would make intraneural recordings in small autonomic nerves challenging. In our  
252 study, 16-channel CFMAs (footprint less than 0.05  $\text{mm}^2$ ; 132  $\mu\text{m}$  pitch along the array and 50  
253  $\mu\text{m}$  between two rows) with ultra-small electrodes (150-250  $\mu\text{m}$  in length, 8-9  $\mu\text{m}$  in diameter)  
254 were implanted in small-diameter (300-500  $\mu\text{m}$ ) rat vagus nerves. Another intraneural electrode  
255 that obtained physiological recordings in small-diameter (100-300  $\mu\text{m}$ ) autonomic nerves (rat  
256 glossopharyngeal and vagus nerves) are carbon nanotube (CNT) electrodes<sup>23</sup>. Two single-  
257 channel CNT electrodes were inserted with a 2-mm separation in a nerve target to obtain only a  
258 single differential recording in that study. The CFMA recorded physiological neural activity on  
259 multiple channels (up to 16 channels), which allowed us to detect the propagation direction and  
260 conduction velocity of some signals (Figure 2). The recording exposure site on each carbon fiber

261 spans 135-160  $\mu\text{m}$  in length from the tip, which provided better spatial selectivity recordings  
262 than CNT electrodes that had an exposed recording segment of  $\sim 500 \mu\text{m}$ . Another research  
263 group developed an intraneural 4-channel carbon fiber array with a similar pitch (150  $\mu\text{m}$ ) as the  
264 CFMA but with longer carbon fibers ( $\geq 350 \mu\text{m}$ ) that recorded from tracheosyringeal nerves of  
265 zebra finch birds (diameter of 125  $\mu\text{m}$ )<sup>31</sup>. They demonstrated an innovative blowtorching  
266 technique for sharpening carbon fibers to directly insert carbon fibers in a nerve, which we  
267 adapted to our shorter (150-250  $\mu\text{m}$ ) CFMA carbon fibers. Although an example of spontaneous  
268 activity was shown using the 4-channel array, the majority of their demonstrated signals were  
269 evoked responses from electrical stimulation.

270 The observed spike waveforms in CFMA recordings from the vagus nerve (e.g. Figures 2-5) are  
271 action potentials generated by individual neurons, based on the waveform shape and time scale  
272 (1-2 msec)<sup>45,46</sup>. Furthermore, we observed propagation of signals in the afferent and efferent  
273 direction within the conduction velocity range for myelinated (A $\delta$  and B) and unmyelinated (C)  
274 fibers (Figure 2), which are present in the vagus nerve<sup>9,10</sup>. However, due to the similarity in the  
275 waveform shapes and the normal variations in waveform amplitudes, we were not able to sort the  
276 detected action potentials into clear single units per channel, with only a few channels yielding  
277 more than one sortable cluster. The active recording site for a CFMA carbon fiber spans 135-160  
278  $\mu\text{m}$  in length from the tip (Figure 1), which exposes the recording site to an estimation of over  
279 200 axons within a distance of 5  $\mu\text{m}$  from the recording site (Figure 6). This estimation is based  
280 on the approximate axon density in the rat vagus nerve, which has around 11,000 axons<sup>28,29</sup>  
281 contained within a diameter of about 300  $\mu\text{m}$ . Further work on reducing the exposed recording  
282 site area may assist in monitoring more localized axon activity with a lower background noise  
283 level<sup>24,42,44</sup>. Moreover, current spike-sorting algorithms are mostly designed for central nervous



284 system recordings<sup>47</sup>, which assume the waveforms are from neuron cell bodies that generate  
285 higher amplitude waveforms and have more diverse shapes than unmyelinated axons. Future  
286 work is needed to study the recording nature in autonomic nerves and develop spike-sorting  
287 algorithms for axonal recordings.

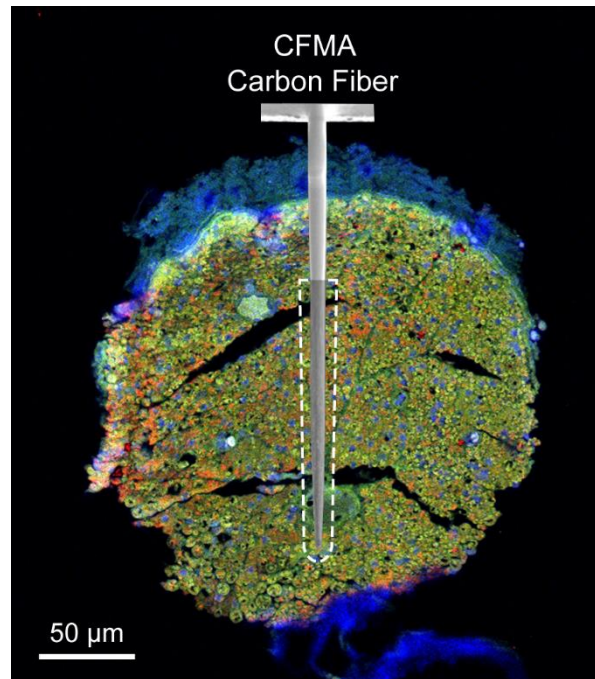

288

289 **Figure 6. Immunohistochemistry image of a rat cervical vagus nerve with a diagram of an inserted CFMA**  
290 **carbon fiber.** The shaded region on the CFMA carbon fiber is the active recording site. The dashed lines specify an  
291 area within a distance of 5 µm from the active recording site of one carbon fiber. The area is estimated to be  
292 occupied by over 200 axons based on the typical axon density of a rat vagus nerve (~11,000 axons in 300 µm  
293 diameter nerve)<sup>28,29</sup>. The nerve sample in this image was stained with 4', 6-diamino-2-phenylindole (DAPI), myelin  
294 basic protein (MBP), and anti-beta III tubuline (TUJ1) to show nucleotides (blue), myelin (green) and axons (red),  
295 respectively.

296

297 Sorted clusters from our recorded vagal nerve activity showed interesting firing rate behavior  
298 that may be related to the measured physiological parameters of breathing rate, heart rate and  
299 blood glucose concentrations. We observed neural clusters with periodic firing-burst behavior at  
300 repetition rates similar to the measured breathing rates (Figure 3). Vagus nerve fibers innervate  
301 the lungs, with critical relevance for breathing control<sup>4,48,49</sup>. Our observed vagal signals may be

302 related to the neural control over breathing or an afferent response to chest and/or lung  
303 expansion<sup>48</sup>. We also observed interesting changes in vagal firing rate behavior after injection of  
304 blood glucose modulation doses (Figure 5). These experiments were performed on fasted rats,  
305 and neural signals before the dose injection may represent vagal afferent signals to drive an  
306 increase in glucose intake. The firing rate of clusters decreased after administration of glucose  
307 (e.g. Figure 5a), which may suggest that the signaling for glucose intake was met. This  
308 observation aligns with previous studies that showed neural recordings from dissected fibers of  
309 afferent hepatic vagus nerve branches in isolated and perfused livers using wire electrodes<sup>50</sup>, and  
310 compound neural activity from the cervical vagus nerve using cuff electrodes after removing the  
311 nerve sheath<sup>36</sup>. Both studies demonstrated similar firing rate changes following the  
312 administration of glucose. The CFMA was also able to determine the propagation of some of  
313 these signals in the afferent direction at a conduction velocity for unmyelinated C-fibers, which  
314 dominate the vagus nerve<sup>28,29</sup>. The increase in firing rate observed after insulin or 2-deoxy-D-  
315 glucose (2-DG) injection, which induces insulin-like symptoms, may represent a surge of  
316 afferent activity to enhance the request for glucose intake (e.g. Figure 5b,c), which aligns with  
317 the previously mentioned studies that also showed increased afferent activity in the hepatic  
318 branch of vagus nerves using wire electrodes<sup>50</sup>, and increased compound activity of cervical  
319 vagus nerves using cuff electrodes<sup>36</sup> within 10 minutes after administration of insulin or 2-DG.  
320 Similarly, the CFMA detected the afferent propagation of some of these signals at a C-fiber  
321 conduction velocity. However, these observed responses were inconsistent across our  
322 experiments with identical injection doses, which may be due to variations in CMFA sampling of  
323 neural activity within the nerve. Moreover, there were similarities in the blood glucose  
324 concentration trends during an experiment to the other measured physiological parameters (i.e.

325 breathing rate and heart rate) in most experiments (e.g. Figures 4 and 5). The anesthetic agent we  
326 used in our experiments was isoflurane, which maintained consistent and stable depth of  
327 anesthesia for recording vagal nerve activity with ultra-small carbon fibers. In preliminary  
328 experiments using other agents (e.g. ketamine), occasional muscle twitches would lead to CFMA  
329 movement or carbon fiber breakage, which were not observed under isoflurane. However,  
330 isoflurane anesthesia suppresses neural activity in the central and autonomic nervous systems  
331 and impacts multiple physiological parameters, including blood glucose concentration,  
332 respiration, and arterial pressure<sup>51,52</sup>. Although this work showed unique in-vivo action potential  
333 recordings from the vagus nerve using CFMA, experiments with minimal or no anesthesia would  
334 allow more physiological activities to occur and may be necessary to clearly link vagal nerve  
335 activity to physiological changes.

336 This work had numerous limitations. The exact insertion location for the CFMA arrays in the  
337 vagus nerve varied between our experiments. The rat cervical vagus nerve is estimated to contain  
338 around 11,000 axons<sup>28,29</sup> that regulate many autonomic functions<sup>4</sup>. To illustrate this variation,  
339 potential breathing-related signals (e.g. Figure 3) were only observed in 6 out of the 22  
340 experiments, although all the rats were breathing normally during the experiments. Furthermore,  
341 we detected propagation direction of some, but not all, recorded vagal signals (e.g. Figure 2),  
342 likely due to the variation in CFMA insertion alignment along the nerve. Additional work on  
343 redesigning the electrode configuration may be needed to cover a wider range of axonal activity  
344 while providing high selectivity for individual recording sites, such as with staggered rows of  
345 carbon fibers with variable lengths. Another limitation is the requirement to lift the nerve for  
346 CFMA insertion, which applies tension on the nerve due to the nerve-holder design. Although  
347 the nerve-holder added the risk of nerve injury, the nerve-holder was necessary to position a

348 camera to visualize the alignment of CFMA carbon fibers with the vagus nerve for insertion  
349 (Figure 1). Redesigning the nerve-holder and possibly restructuring the implantation procedure  
350 may be needed to eliminate the applied tension and avoid the risk of injuring the nerve. This  
351 study only demonstrated CFMA recordings from the rat vagus nerve. However, the CFMA also  
352 recorded action potentials from the cat pudendal nerve and rat sural nerve, a branch of the sciatic  
353 nerve, in preliminary experiments (data not shown). Future studies on physiological neural  
354 recordings from various peripheral nerves will provide new perspectives on neural control  
355 processes.

356 Overall, our experiments demonstrated that CFMAs are a novel interface for in-vivo, high-  
357 density, multi-channel, intraneural action potential recordings in small autonomic nerves. Further  
358 work is needed to refine the selectivity of CFMA and develop a chronic form for long-term,  
359 behavioral recordings in autonomic nerves without the presence of anesthesia. This work  
360 provided insights in intraneural axonal recordings and is a milestone towards the comprehensive  
361 understanding of physiological signaling in autonomic nerves, which may lead to the  
362 development of innovative treatment modalities for restoring regulatory functions.

363

## 364 **Methods**

### 365 *Fabrication of Carbon Fiber Microelectrode Array*

366 The independent components for fabricating carbon fiber microelectrode arrays (CFMAs) are  
367 described in detail elsewhere<sup>42-44,53</sup>. Briefly, a printed circuit board (PCB) was custom  
368 manufactured (MicroConnex, Snoqualmie, WA, USA). A connector (A79024-001, Omnetics

369 Connector Corp., Minneapolis, MN, USA) was soldered on one end of the PCB and covered  
370 with epoxy. On the other end, 16 bare carbon fibers (T-650/35 3 K, Cytec Industries, Woodland  
371 Park, NJ, USA) with a length of 2-3 mm were attached to the PCB in a 2-row (2x8)  
372 configuration. The pitch was 132  $\mu\text{m}$  within a row and the separation between the two rows was  
373 50  $\mu\text{m}$ . The array was coated with approximately 800 nm of parylene-c (PDS 2035, Specialty  
374 Coating Systems Inc., Indianapolis, IN, USA) for insulation. The insulated carbon fibers had a  
375 diameter of 8-9  $\mu\text{m}$  and were cut down to 150-250  $\mu\text{m}$  in length. The base of the carbon fibers  
376 were submerged in water and the tips were sharpened with a blowtorch<sup>31</sup> (MT-51, Master  
377 Appliance Corp., Racine, WI, USA) after aligning the carbon fibers with their reflection on the  
378 underside of the water surface. The exposed carbon on the sharpened tips (135-160  $\mu\text{m}$ ) were  
379 electrodeposited with poly(3,4-ethylene-dioxythiophene):sodium p-toluenesulfonate  
380 (PEDOT:pTS) by applying 600 pA/fiber for 600 sec. Finally, individual ground and reference  
381 wires (AGT05100, World Precision Instruments, Sarasota, FL, USA) were soldered to the PCB.

### 382 *Design of Nerve-Holder*

383 To facilitate the insertion of a CFMA in a vagus nerve, we designed a nerve-holder to secure and  
384 elevate the vagus nerve away from fluid and breathing motions of the cervical cavity, and allow  
385 accurate positioning of a small camera to visualize the CFMA-nerve interface during insertion.  
386 The nerve-holder had a hollow center to allow insertion of carbon fibers without breakage, and to  
387 drain excess fluid around the nerve which may obscure the camera view. To handle the nerve-  
388 holder, a circular threaded rod (21YN67, Grainger Inc., Lake Forest, IL, USA) was inserted in  
389 the holder and was connected to a soldering arm (900-015, Eclipse, Amelia Court House, VA,  
390 USA). The nerve-holder was designed using a computer-aided design (CAD) software (Fusion

391 360, Autodesk, San Rafael, CA, USA) and 3D-printed with clear resin (Form 2, Formlabs,  
392 Somerville, MA, USA). The dimensions of the design are shown in Supplementary Fig. S1.

### 393 *Animal Surgery*

394 All experimental procedures were approved by the University of Michigan Institutional Animal  
395 Care and Use Committee (IACUC). Non-survival experiments were performed on male (0.48-  
396 0.83 kg) and female (0.36-0.42 kg) Sprague-Dawley rats (Charles Rivers Laboratories,  
397 Wilmington, MA, USA). The animals were housed in ventilated cages under controlled  
398 temperature, humidity, and photoperiod (12-h light/dark cycle), and provided with laboratory  
399 chow (5L0D, LabDiet, St. Louis, MO, USA) and tap water ad libitum. The rats were fasted for 3  
400 hours before the procedure. Anesthesia was induced by 5% isoflurane (Fluriso, VetOne, Boise,  
401 ID, USA) and maintained at 2-3% isoflurane. Rats were placed on a heating pad (ReptiTherm,  
402 Zoo Med Laboratories Inc., San Luis Obispo, CA, USA). A vitals-monitor (SurgiVet, Smiths  
403 Medical, Norwell, MA, USA) was used to monitor heart rate with an oxygen saturation (SpO<sub>2</sub>)  
404 sensor. A midline ventral cervical incision was made, and retractors (17009-07, Fine Science  
405 Tools Inc., Foster City, CA, USA) were used to maintain the cervical opening. Using a dissection  
406 microscope (Lynx EVO, Vision Engineering Inc., New Milford, CT, USA), the left cervical  
407 vagus nerve (9-12 mm in length) was isolated from the carotid artery and surrounding tissue  
408 using fine forceps (00632-11, Fine Science Tools Inc., Foster City, CA, USA). The vagus nerve  
409 was lifted (~2 mm) and placed on the nerve-holder to facilitate CFMA insertion. The heating pad  
410 and dissection microscope were disconnected to reduce electrical noise.

### 411 *CFMA Insertion*

412 The CFMA was accurately controlled by a micromanipulator (KITE-R, World Precision  
413 Instruments, Sarasota, FL, USA) that was secured on an optical breadboard (MB1218, Thorlabs  
414 Inc., Newton, NJ, USA) under the animal. The ground wire for the CFMA was inserted  
415 subcutaneously in the cervical region and the reference wire was placed in fluid or tissue  
416 underneath the nerve-holder. A small pen-shaped camera (MS100, Teslong, Shenzhen, China)  
417 was placed in the cervical opening to visualize and align the CFMA fibers for insertion. The  
418 nerve was rinsed with saline (0.9% NaCl, Baxter International Inc., Deerfield, IL, USA) and the  
419 CFMA was inserted in the vagus nerve.

420 The CFMA was connected to a neural interface processor (Grapevine, Ripple LLC, Salt Lake  
421 City, UT, USA) that recorded signals at a sampling rate of 30 kHz on a linked desktop computer.  
422 Impedances were measured with the neural interface processor at 1 kHz in saline before the  
423 procedure, in the nerve immediately after insertion, and in the nerve at the end of the experiment.

#### 424 ***Experimental Protocol***

425 After completion of surgery and insertion of the CFMA, a baseline recording period of at least 5  
426 minutes was obtained. A dose of glucose (n=6; 1 g, Dextrose 50%, Hospira, Lake Forest, IL,  
427 USA), insulin (n=6; 20 U, Vetsulin, Merck Animal Health, Madison, NJ, USA), 2-deoxy-D-  
428 glucose (n=6; 60 mg, D8375-1G, Sigma-Aldrich, St. Louis, MO, USA), or saline (n=4; 1.0 mL,  
429 0.9% NaCl, Baxter International Inc., Deerfield, IL, USA) was injected intraperitoneally (IP).  
430 Recordings from the CFMA were continued for 60 minutes after the injection. Measurements of  
431 blood glucose concentration with a glucometer (AlphaTRAK 2, Abbott, Abbott Park, IL, USA),  
432 heart rate with the SpO<sub>2</sub> sensor, and breathing rate with a timer were obtained every 5 minutes.  
433 The glucometer was unable to measure blood glucose concentrations above 750 mg/dL in one

434 experiment due to the limitations of the glucometer. In experiments with observed breathing-  
435 related neural signals (n=3), a recording period of 1 minute was obtained at 2% isoflurane,  
436 followed by a 5-minute recording at 5% isoflurane. At the end of the experiment, animals were  
437 euthanized with an overdose of sodium pentobarbital (400 mg/kg IP, Euthanasia Solution,  
438 VetOne, Boise, ID, USA).

### 439 *Analysis of Neural Recordings*

440 The recorded signals were sorted into clusters using Wave\_clus<sup>54</sup>, which is a spike-sorting  
441 MATLAB-based algorithm that uses wavelet decomposition to extract waveform features and  
442 superparamagnetic clustering to cluster the spikes. The signals were filtered with a band-pass  
443 filter at 300-10,000 Hz. The spike detection threshold was set between  $3.3$  and  $10.1\sigma$  [ $\sigma =$   
444  $\text{median}(|\text{filtered signal}| / 0.6745)$ ]<sup>54</sup>. The sorted clusters were exported to MATLAB (R2014b,  
445 MathWorks, Natick, MA, USA) for analysis. Firing rates were calculated with a bin duration of  
446 1 sec. To calculate signal-to-noise ratio (SNR), the mean peak-to-peak amplitude (Vpp) of a  
447 sorted cluster was determined and noise intervals with a total duration of at least 7 sec were  
448 specified at periods with no occurring spikes or artifacts [ $\text{SNR} = \text{Vpp} / (2 \times \text{standard deviation of}$   
449  $\text{noise})$ ]<sup>41,43</sup>. Cross-correlation was performed between the sorted clusters across all the recording  
450 carbon fibers of a CFMA to inspect the latency of spikes along the CFMA. Latencies with high  
451 occurrences (count  $\gg$  mean occurrence) were identified, and the signal traces on adjacent  
452 recording carbon fibers were manually reviewed to confirm instances of signal propagation  
453 before determining the conduction velocity and signal propagation direction for these high-  
454 occurring latencies. The bin-size for the latency counts was set at 0.2 msec, except for one  
455 experiment that had multiple high counts at zero latency with this 0.2 msec bin-size resolution.  
456 For this experiment only, the bin-size was set at 0.01 msec to provide latency counts with higher



457 resolution. The correlation coefficient ( $\rho$ ) was calculated for all sorted clusters between the firing  
458 rate of each cluster and the measured physiological parameters (breathing rate, heart rate and  
459 blood glucose concentration) for that experiment. Since the physiological measurements were  
460 much less frequent (every 5 minutes) than cluster firing rates (every second), the average cluster  
461 firing rate for 1 minute, centered at the time of each physiological measurement, was determined  
462 and used for the correlation coefficient computations. When appropriate, data are presented as  
463 mean  $\pm$  standard deviation (SD).

464

#### 465 **Data Availability**

466 All raw recordings, sorted neural clusters, and analysis codes will be available on the Blackfynn  
467 data repository platform at DOI: <https://doi.org/10.26275/j5wc-rwcr> once it has completed NIH  
468 SPARC data curation.

469

#### 470 **References**

- 471 1. McCorry, L. K. Physiology of the Autonomic Nervous System. *Am. J. Pharm. Educ.* **71**,  
472 (2007).
- 473 2. Agostoni, E., Chinnock, J. E., De Burgh Daly, M. & Murray, J. G. Functional and  
474 Histological Studies of the Vagus Nerve and its Branches to the Heart, Lungs and  
475 Abdominal Viscera in the Cat. *J. Physiol.* (1957).
- 476 3. Andrews, P. L. R. Vagal afferent innervation of the gastrointestinal tract. *Prog. Brain Res.*  
477 **67**, 65–86 (1986).
- 478 4. Berthoud, H. R. & Neuhuber, W. L. Functional and chemical anatomy of the afferent  
479 vagal system. *Auton. Neurosci. Basic Clin.* **85**, 1–17 (2000).
- 480 5. Borovikova, L. V *et al.* Vagus nerve stimulation attenuates the systemic inflammatory

- 481 response to endotoxin. *Nature* **405**, 458–462 (2000).
- 482 6. Browning, K. N., Verheijden, S. & Boeckxstaens, G. E. The Vagus Nerve in Appetite  
483 Regulation, Mood, and Intestinal Inflammation. *Gastroenterology* **152**, 730–744 (2017).
- 484 7. Berthoud, H. R. The vagus nerve, food intake and obesity. *Regul. Pept.* **149**, 15–25  
485 (2008).
- 486 8. Waise, T. M. Z., Dranse, H. J. & Lam, T. K. T. The metabolic role of vagal afferent  
487 innervation. *Nat. Rev. Gastroenterol. Hepatol.* **15**, 625–636 (2018).
- 488 9. Qing, K. Y. *et al.* B fibers are the best predictors of cardiac activity during Vagus nerve  
489 stimulation. *Bioelectron. Med.* **4**, 5 (2018).
- 490 10. Kajekar, R., Proud, D., Myers, A. C., Meeker, S. N. & Udem, B. J. Characterization of  
491 vagal afferent subtypes stimulated by bradykinin in guinea pig trachea. *J. Pharmacol. Exp.*  
492 *Ther.* **289**, 682–687 (1999).
- 493 11. Hoffman, H. H. & Schnitzlein, H. N. The numbers of nerve fibers in the vagus nerve of  
494 man. *Anat. Rec.* **139**, 429–435 (1961).
- 495 12. Evans, D. H. L. & Murray, J. G. Histological and Functional Studies on the Fibre  
496 Composition of the Vagus Nerve of the Rabbit. *J. Anat.* **88**, 320–37 (1954).
- 497 13. Foley, J. O. & DuBois, F. S. Quantitative Studies of the Vagus Nerve in the Cat. I. The  
498 Ratio of Sensory to Motor Fibers. *J. Comp. Neurol.* **67**, (1937).
- 499 14. Tracey, K. J. The Revolutionary Future of Bioelectronic Medicine. *Bioelectron. Med.* **1**,  
500 (2014).
- 501 15. Birmingham, K. *et al.* Bioelectronic medicines: A research roadmap. *Nat. Rev. Drug*  
502 *Discov.* **13**, 399–400 (2014).
- 503 16. Pavlov, V. A. & Tracey, K. J. Bioelectronic medicine: updates, challenges and paths  
504 forward. *Bioelectron. Med.* **5**, 1–4 (2019).
- 505 17. Ben-Menachem, E. Vagus-nerve stimulation for the treatment of epilepsy. *Lancet Neurol.*  
506 **1**, 477–482 (2002).
- 507 18. Dawson, J. *et al.* Safety, feasibility, and efficacy of vagus nerve stimulation paired with  
508 upper-limb rehabilitation after ischemic stroke. *Stroke* **47**, 143–150 (2016).
- 509 19. Spindler, P., Bohlmann, K., Straub, H. B., Vajkoczy, P. & Schneider, U. C. Effects of  
510 vagus nerve stimulation on symptoms of depression in patients with difficult-to-treat  
511 epilepsy. *Seizure* **69**, 77–79 (2019).
- 512 20. Koopman, F. A. *et al.* Vagus nerve stimulation inhibits cytokine production and attenuates  
513 disease severity in Rheumatoid arthritis. *Proc. Natl. Acad. Sci. U. S. A.* **113**, 8284–8289

- 514 (2016).
- 515 21. Apovian, C. M. *et al.* Two-Year Outcomes of Vagal Nerve Blocking (vBloc) for the  
516 Treatment of Obesity in the ReCharge Trial. *Obes. Surg.* **27**, 169–176 (2017).
- 517 22. Shikora, S. a *et al.* Intermittent Vagal Nerve Block for Improvements in Obesity,  
518 Cardiovascular Risk Factors, and Glycemic Control in Patients with Type 2 Diabetes  
519 Mellitus: 2-Year Results of the VBLOC DM2 Study. *Obes Surg* (2015)  
520 doi:10.1007/s11695-015-1914-1.
- 521 23. McCallum, G. A. *et al.* Chronic interfacing with the autonomic nervous system using  
522 carbon nanotube (CNT) yarn electrodes. *Sci. Rep.* **7**, 1–14 (2017).
- 523 24. Yan, D. *et al.* Microneedle Penetrating Array with Axon-Sized Dimensions for Cuff-less  
524 Peripheral Nerve Interfacing. *Proc. 9th Int. IEEE EMBS Conf. Neural Eng.* 827–830  
525 (2019).
- 526 25. Micera, S. & Navarro, X. Bidirectional Interfaces with the Peripheral Nervous System.  
527 *Int. Rev. Neurobiol.* **86**, 23–38 (2009).
- 528 26. Larson, C. E. & Meng, E. A Review for the Peripheral Nerve Interface Designer. *J.*  
529 *Neurosci. Methods* **332**, 108523 (2019).
- 530 27. Guo, T. *et al.* Extracellular single-unit recordings from peripheral nerve axons in vitro by  
531 a novel multichannel microelectrode array. *Sensors Actuators, B Chem.* **315**, (2020).
- 532 28. Gabella, G. & Pease, H. L. Number of axons in the abdominal vagus of the rat. *Brain Res.*  
533 **58**, 465–469 (1973).
- 534 29. Prechtl, J. C. & Powley, T. L. The fiber composition of the abdominal vagus of the rat.  
535 *Anat. Embryol. (Berl).* **181**, 101–115 (1990).
- 536 30. Ward, M. P. *et al.* A flexible platform for biofeedback-driven control and personalization  
537 of Electrical nerve stimulation therapy. *IEEE Trans. Neural Syst. Rehabil. Eng.* **23**, 475–  
538 484 (2015).
- 539 31. Gillis, W. F. *et al.* Carbon fiber on polyimide ultra-microelectrodes. *J. Neural Eng.* **15**,  
540 (2018).
- 541 32. Silverman, H. A. *et al.* Standardization of methods to record Vagus nerve activity in mice.  
542 *Bioelectron. Med.* **4**, 1–13 (2018).
- 543 33. Zanos, T. *et al.* Identification of cytokine-specific sensory neural signals by decoding  
544 murine vagus nerve activity. *Proc. Natl. Acad. Sci.* in press (2018)  
545 doi:10.1073/pnas.1719083115.
- 546 34. Shikano, Y., Nishimura, Y., Okonogi, T., Ikegaya, Y. & Sasaki, T. Vagus nerve spiking  
547 activity associated with locomotion and cortical arousal states in a freely moving rat. *Eur.*

- 548 *J. Neurosci.* **49**, 1298–1312 (2019).
- 549 35. González-González, M. A. *et al.* Thin Film Multi-Electrode Softening Cuffs for Selective  
550 Neuromodulation. *Sci. Rep.* **8**, 1–15 (2018).
- 551 36. Masi, E. B. *et al.* Identification of hypoglycemia-specific neural signals by decoding  
552 murine vagus nerve activity. *Bioelectron. Med.* **5**, (2019).
- 553 37. Mathews, K. S. *et al.* Acute monitoring of genitourinary function using intrafascicular  
554 electrodes: Selective pudendal nerve activity corresponding to bladder filling, bladder  
555 fullness, and genital stimulation. *Urology* **84**, 722–729 (2014).
- 556 38. Wark, H. A. C. *et al.* A new high-density (25 electrodes/mm<sup>2</sup>) penetrating microelectrode  
557 array for recording and stimulating sub-millimeter neuroanatomical structures. *J. Neural*  
558 *Eng.* **10**, (2013).
- 559 39. DiBona, G. & Sawin, L. Role of Renal Alpha-2-Adrenergic Receptors in Spontaneously  
560 Hypertensive Rats. *Hypertension* **9**, (1987).
- 561 40. DiBona, G. F., Sawin, L. L. & Jones, S. Y. Differentiated sympathetic neural control of  
562 the kidney. *Am. J. Physiol.* **271**, R84–R90 (1996).
- 563 41. Kozai, T. *et al.* Ultrasmall Implantable Composite Microelectrodes with Bioactive  
564 Surfaces for Chronic Neural Interfaces. *Nat. Mater.* **11**, 1065–73 (2012).
- 565 42. Patel, P. R. *et al.* Insertion of linear 8.4  $\mu$  m diameter 16 channel carbon fiber electrode  
566 arrays for single unit recordings. *J. Neural Eng.* **12**, 046009 (2015).
- 567 43. Patel, P. R. *et al.* Chronic in vivo stability assessment of carbon fiber microelectrode  
568 arrays. *J. Neural Eng.* **13**, 066002 (2016).
- 569 44. Welle, E. J. *et al.* Ultra-small carbon fiber electrode recording site optimization and  
570 improved in-vivo chronic recording yield. *J. Neural Eng.* (2020).
- 571 45. Moffitt, M. a & McIntyre, C. C. Model-based analysis of cortical recording with silicon  
572 microelectrodes. *Clin. Neurophysiol.* **116**, 2240–50 (2005).
- 573 46. Henze, D. A. *et al.* Intracellular features predicted by extracellular recordings in the  
574 hippocampus in vivo. *J. Neurophysiol.* **84**, 390–400 (2000).
- 575 47. Rey, H. G., Pedreira, C. & Quiñero, R. Past, present and future of spike sorting  
576 techniques. *Brain Res. Bull.* **119**, 106–117 (2015).
- 577 48. Chang, R. B., Strohlic, D. E., Williams, E. K., Umans, B. D. & Liberles, S. D. Vagal  
578 sensory neuron subtypes that differentially control breathing. *Cell* **161**, 622–633 (2015).
- 579 49. McAllen, R. M., Shafton, A. D., Bratton, B. O., Trevaks, D. & Furness, J. B. Calibration  
580 of thresholds for functional engagement of vagal A, B and C fiber groups in vivo .

- 581 *Bioelectron. Med.* **1**, 21–27 (2018).
- 582 50. Nijjima, A. Glucose-sensitive afferent nerve fibers in the liver and their role in food intake  
583 and blood glucose regulation. *J. Auton. Nerv. Syst.* **9**, 207–20 (1983).
- 584 51. Skovsted, P. & Saphthavichaiikul, S. The Effects of Isoflurane on Arterial Pressure, Pulse  
585 Rate, Autonomic Nervous Activity, and Barostatic Reflexes. *Canad. Anaesth. Soc. J.* **24**,  
586 (1977).
- 587 52. Carli, F., Ronzoni, G., Webster, J., Khan, K. & Elia, M. The independent metabolic  
588 effects of halothane and isoflurane anaesthesia. *Acta Anaesthesiol. Scand.* **37**, 672–678  
589 (1993).
- 590 53. Welle, E. J. *et al.* Fabrication and characterization of a carbon fiber peripheral nerve  
591 electrode appropriate for chronic recording. in *Society for Neuroscience 49th Annual*  
592 *Meeting, Chicago, IL*, (2019).
- 593 54. Chaure, F. J., Rey, H. G. & Quian Quiroga, R. A novel and fully automatic spike-sorting  
594 implementation with variable number of features. *J. Neurophysiol.* **120**, 1859–1871  
595 (2018).

596

597

## 598 **Acknowledgements**

599 We thank Dr. Randy Seeley and Dr. Malcolm Low for their advice on designing the experiments,  
600 Dr. Zach Sperry, Aileen Ouyang, Eric Kennedy and Dr. Lauren Zimmerman for their assistance  
601 in surgical preparation, Joey Letner for his guidance on data analysis, and Dr. Steve Kemp, Dr.  
602 Dan Ursu, Jana Moon, Charles Hwang and Sasha Meshinchi for preparing and imaging the  
603 immunohistochemistry nerve sample. This research was supported by the National Institute of  
604 Health (NIH) Stimulating Peripheral Activity to Relieve Conditions (SPARC) Program (Award  
605 1OT2OD024907) and the National Science Foundation (Award 1707316).

606

## 607 **Author Contributions**

608 Planned study – AAJ, JPS, CAC, TMB. Fabricated arrays – EJW, PRP, JMR, CAC. Performed  
609 surgeries and collected data – AAJ, DCR, ECB, TMB. Analyzed data – AAJ, DCR, ECB, TMB.  
610 Drafted manuscript – AAJ, TMB. Reviewed manuscript and approved final version – AAJ,  
611 DCR, EJW, PRP, JMR, ECB, JPS, CAC, TMB.

612

### 613 **Competing Interests**

614 Authors CAC, EJW, JPS, PRP, AAJ, and TMB are co-authors on a patent application on the  
615 development of the carbon fiber microelectrode array. Priority date June 22, 2018. Application #  
616 PCT/US2019/038500. The authors declare no other competing interests.

617

### 618 **Figure Legends**

619 **Figure 2. Carbon Fiber Microelectrode Array (CFMA) and experimental setup.** (a) CFMA  
620 with 16 blowtorch-sharpened carbon fibers in a 2x8 configuration. (b) Scanning Electron  
621 Microscopy (SEM) images of sharpened carbon fibers. Arrows indicate an exposed (non-  
622 insulated) carbon fiber region with a length of ~140  $\mu\text{m}$  from the tip. (c) Design of a nerve-  
623 holder to facilitate CFMA insertion in a rat vagus nerve. Dimensions of the design are shown in  
624 Supplementary Fig. S1. (d) Surgical setup for inserting CFMA in the vagus nerve. (e) Timeline  
625 for the experimental protocol. An intraperitoneal (IP) dose of glucose, insulin, 2-deoxy-D-  
626 glucose, or saline was injected to modulate blood glucose concentration levels.

627 **Figure 2. Representative recordings of physiological vagal nerve activity and signal**  
628 **propagation along CFMA carbon fibers (CFs).** (a) Recordings of vagal nerve activity on 2  
629 carbon fibers (CF 1 and CF 7) in the same experiment showing distinctive signals. The firing of  
630 sorted spikes (marked with x) are unique across CFs. (b) Instances of signal propagation along  
631 CF 1 – CF 4. (c) Cross correlation of spikes on CF 1 and CF 4. The prevalent latency occurred at  
632 -0.6 msec with a count of 174 spikes (55.8% of spikes on CF 4). At latency of -0.6 msec, the  
633 spikes occurred on CF 4 before CF 1, suggesting that the signal is propagating in the afferent  
634 direction at a conduction velocity of 0.7 m/sec.

635 **Figure 3. Breathing-related neural activity.** (a) Recordings of vagus nerve activity at 2% and  
636 5% isoflurane. The bursting firing behavior had a repetition rate of 32.2 cycles/min ( $1/T_1$ ) during  
637 animal's breathing rate of 32 breaths/min at 2% isoflurane. The firing-behavior repetition rate  
638 reduced to 14.2 cycles/min ( $1/T_2$ ) as the breathing rate reduced to ~12 breaths/min at 5%  
639 isoflurane. The average peak-to-peak amplitude ( $V_{pp}$ ) and inter-spike interval (ISI) peaks were  
640 similar for the spike waveforms at 2% and 5% isoflurane. (b) Bursting firing behavior at two  
641 distinct ISIs indicated at the  $t_1$  and  $t_2$  durations. The animal's breathing rate was ~44 breaths/min  
642 and the repetition rate for the bursting firing behavior was 47.3 cycles/min ( $1/[t_1+t_2]$ ).

643 **Figure 4. Vagus nerve recordings with sorted clusters in an insulin-injected experiment.** (a)  
644 Filtered signal of a vagus nerve recording, firing rates of the two sorted clusters, and  
645 measurements of blood glucose (BG) concentration, breathing rate (BR) and heart rate (HR). The  
646 waveforms of the sorted clusters are shown with the average peak-to-peak amplitude ( $V_{pp}$ ),  
647 signal-to-noise ratio (SNR), and correlation coefficients ( $\rho$ ) between cluster firing rate and BG,  
648 BR and HR measurements. The red boxes in the voltage plot indicate the time-window for the

649 plots in b. **(b)** Filtered signal of the vagus nerve recording before and after insulin injection, and  
650 the spike waveforms of the two sorted clusters within each 10-sec window.

651 **Figure 5. Examples of sorted clusters and their firing rates in blood glucose modulated**

652 **conditions.** The clusters were observed in blood glucose modulation experiments with an

653 intraperitoneal (IP) injection of **(a)** glucose, **(b)** insulin, **(c)** 2-deoxy-D-glucose (2-DG), or **(d)**

654 saline. The waveforms of the sorted clusters are shown with the average peak-to-peak amplitude

655 ( $V_{pp}$ ), signal-to-noise ratio (SNR), correlation coefficients ( $\rho$ ) between cluster firing rate and

656 blood glucose (BG) concentration, breathing rate (BR) and heart rate (HR). Blood glucose

657 concentration measurements above 750 mg/dL were not available due to the limitations of the

658 glucometer.

659 **Figure 6. Immunohistochemistry image of a rat cervical vagus nerve with a diagram of an**

660 **inserted CFMA carbon fiber.** The shaded region on the CFMA carbon fiber is the active

661 recording site. The dashed lines specify an area within a distance of 5  $\mu\text{m}$  from the active

662 recording site of one carbon fiber. The area is estimated to be occupied by over 200 axons based

663 on the typical axon density of a rat vagus nerve ( $\sim 11,000$  axons in 300  $\mu\text{m}$  diameter nerve)<sup>28,29</sup>.

664 The nerve sample in this image was stained with 4', 6-diamino-2-phenylindole (DAPI), myelin

665 basic protein (MBP), and anti-beta III tubuline (TUJ1) to show nucleotides (blue), myelin

666 (green) and axons (red), respectively.
